# Supplementary material for: Characterization of Volatile Organic Compounds from Waterborne and Nectar-Dwelling Yeasts Attractive to Asian Tiger Mosquitoes
Source: Research Square preprint supplement (doi:10.21203/rs.3.rs-7258136/v1), 2025-08-08
Supplement: Supplementary file 1 [file 5cc53b7e5d9bd6d4dc1682c2.xlsx]

## Sheet: Dwelling-nectar yeasts
	Evaluation of yeasts attractiveness to nectar-seeking Aedes albopictus using the LAM (Large Activity Monitoring) System. Assessment of five yeast species attractiveness were performed for male and female mosquitoes at two cell densities: 3×10³ and 3×10⁵ cells.mL⁻¹. The mosquito was placed at the center of a glass tube, where it could choose between a cotton pad soaked in sterile culture medium (L…
	Variable	Factor	df	χ 2	p-value
	Number of movements	Mosquito sex	1	0.031	0.861
		Yeast concentration	1	0.139	0.708
		Yeast presence	1	2.132	0.128
		Yeast species	3	5.315	0.151
		Mosquito sex*Yeast concentration	1	0.538	0.463
		Mosquito sex*Yeast presence	1	0.021	0.885
		Yeast concentration*Yeast presence	1	0.217	0.641
		Mosquito sex*Yeast species	3	18.521	0.001
		Yeast concentration*Yeast species	3	11.591	0.008
		Yeast presence*Yeast species	3	1.901	0.593
		Yeast concentration*Yeast species	1	2.193	0.139
		Yeast concentration*Yeast species	3	8.057	0.045
		Mosquito sex*Yeast presence*Yeast species	3	9.312	0.025
		Yeast concentration*Yeast presence*Yeast species	3	3.048	0.384
		Mosquito sex*Yeast concentration*Yeast presence*Yeast species	3	1.304	0.783
	Data from 16 independent replicates for each modality were analyzed using a Generalized Linear Mixed Model (GLMM) with a quasi-poisson distribution. Statistically significant differences between groups were identified with Tukey post hoc tests (p < 0.05).

## Sheet: Post-hoc Dwelling-nectar yeast 
	Post hoc tests realized to assess the impact of dwelling-nectar yeast species and their cell concentration on sugar-feeding preference of adult Aedes albopictus mosquitoes.
	Contrast	Mosquito sex	Yeast species	Cell concentration (cells.mL-1)	Estimate	SE	df	z.ratio	p-value
	medium - yeast	female	R. glutinis	5.10³	-0.094	0.241	Inf	-0.390	0.696
	medium - yeast	male	R. glutinis	5.10³	-0.119	0.165	Inf	-0.722	0.470
	medium - yeast	female	F. magnum	5.10³	0.044	0.213	Inf	0.208	0.836
	medium - yeast	male	F. magnum	5.10³	0.146	0.293	Inf	0.497	0.619
	medium - yeast	female	A. pullulans	5.10³	0.152	0.208	Inf	0.731	0.465
	medium - yeast	male	A. pullulans	5.10³	0.014	0.256	Inf	0.056	0.956
	medium - yeast	female	M. reukaufii	5.10³	-0.147	0.285	Inf	-0.516	0.606
	medium - yeast	male	M. reukaufii	5.10³	-0.878	0.290	Inf	-3.030	0.002
	medium - yeast	female	R. glutinis	5.10⁵	-0.108	0.284	Inf	-0.381	0.704
	medium - yeast	male	R. glutinis	5.10⁵	-0.010	0.221	Inf	-0.046	0.963
	medium - yeast	female	F. magnum	5.10⁵	-0.208	0.258	Inf	-0.806	0.420
	medium - yeast	male	F. magnum	5.10⁵	0.036	0.281	Inf	0.127	0.899
	medium - yeast	female	A. pullulans	5.10⁵	-0.433	0.190	Inf	-2.278	0.023
	medium - yeast	male	A. pullulans	5.10⁵	0.182	0.203	Inf	0.894	0.371
	medium - yeast	female	M. reukaufii	5.10⁵	0.071	0.182	Inf	0.388	0.698
	medium - yeast	male	M. reukaufii	5.10⁵	-0.521	0.284	Inf	-1.833	0.043
	For each modality, a total of 16 independent replicates were realized and analyzed using a Generalized Linear Mixed Model (GLMM) with a quasi-poisson distribution. Statistically significant differences between groups were identified with Tukey post hoc tests (p < 0.05).

## Sheet: Post-hoc waterborne yeast
	Post hoc tests realized to evaluate the impact of yeast species and their cell concentration on Aedes albopictus female oviposition behavior.
	Oviposition preference (n = 24)
	Contrast	Yeast species	Estimate	SE	df	z.ratio	p-value
	0 - 5.10²	T. delbrueckii	-0.181	0.604	Inf	-0.299	0.952
	0 - 5.10⁵	T. delbrueckii	-1.043	0.541	Inf	-1.929	0.131
	5.10² - 5.10⁵	T. delbrueckii	-0.862	0.514	Inf	-1.679	0.213
	0 - 5.10²	P. kluyveri	-0.953	0.619	Inf	-1.539	0.272
	0 - 5.10⁵	P. kluyveri	-0.978	0.605	Inf	-1.618	0.238
	5.10² - 5.10⁵	P. kluyveri	-0.025	0.500	Inf	-0.050	0.999
	0 - 5.10²	P. laurentii	-1.356	0.665	Inf	-2.040	0.103
	0 - 5.10⁵	P. laurentii	-1.284	0.676	Inf	-1.898	0.139
	5.10² - 5.10⁵	P. laurentii	0.072	0.484	Inf	0.149	0.988
	0 - 5.10²	R. mucilaginosa	-0.397	0.455	Inf	-0.872	0.658
	0 - 5.10⁵	R. mucilaginosa	-0.941	0.437	Inf	-2.151	0.020
	5.10² - 5.10⁵	R. mucilaginosa	-0.544	0.398	Inf	-1.369	0.357
	0 - 5.10²	K. sloffiae	-0.220	0.394	Inf	-0.558	0.842
	0 - 5.10⁵	K. sloffiae	-0.781	0.366	Inf	-2.133	0.032
	5.10² - 5.10⁵	K. sloffiae	-0.561	0.351	Inf	-1.599	0.246
	0 - 5.10²	H. uvarum	0.376	0.365	Inf	1.030	0.558
	0 - 5.10⁵	H. uvarum	-0.026	0.335	Inf	-0.078	0.997
	5.10² - 5.10⁵	H. uvarum	-0.403	0.379	Inf	-1.063	0.537
	Oviposition stimulation (n = 25)
	Contrast	Yeast species	Estimate	SE	df	z.ratio	p-value
	0 - 5.10²	T. delbrueckii	-9.377	7.050	Inf	-1.330	0.378
	0 - 5.10⁵	T. delbrueckii	20.640	5.915	Inf	3.489	0.001
	5.10² - 5.10⁵	T. delbrueckii	30.018	7.160	Inf	4.193	0.0001
	0 - 5.10²	P. kluyveri	-4.922	6.909	Inf	-0.712	0.756
	0 - 5.10⁵	P. kluyveri	-6.017	7.008	Inf	-0.859	0.666
	5.10² - 5.10⁵	P. kluyveri	-1.095	7.964	Inf	-0.138	0.990
	0 - 5.10²	P. laurentii	2.411	7.990	Inf	0.302	0.951
	0 - 5.10⁵	P. laurentii	-2.334	6.855	Inf	-0.341	0.938
	5.10² - 5.10⁵	P. laurentii	-4.746	8.798	Inf	-0.539	0.852
	0 - 5.10²	R. mucilaginosa	-13.638	6.893	Inf	-1.978	0.118
	0 - 5.10⁵	R. mucilaginosa	-4.589	6.393	Inf	-0.718	0.753
	5.10² - 5.10⁵	R. mucilaginosa	9.050	7.413	Inf	1.221	0.441
	0 - 5.10²	K. sloffiae	-2.478	6.573	Inf	-0.377	0.925
	0 - 5.10⁵	K. sloffiae	2.007	6.021	Inf	0.333	0.941
	5.10² - 5.10⁵	K. sloffiae	4.485	6.784	Inf	0.661	0.786
	0 - 5.10²	H. uvarum	-21.017	9.168	Inf	-2.292	0.065
	0 - 5.10⁵	H. uvarum	-22.296	7.687	Inf	-2.900	0.014
	5.10² - 5.10⁵	H. uvarum	-1.279	10.475	Inf	-0.122	0.992

## Sheet: Post-hoc Total stimulation
	Post hoc tests were conducted to assess the effect of yeast concentrations on the ovipositon stimulation of gravid female Aedes albopictus mosquitoes.
	Contrast	Yeast	Estimate	SE	df	z.ratio	p-value
	0 - 5.10²	T. delbrueckii	-9.37748	7.05025	Inf	-1.33009	0.378395
	0 - 5.10⁵	T. delbrueckii	20.6401	5.91506	Inf	3.48942	0.0014055
	5.10² - 5.10⁵	T. delbrueckii	30.0176	7.15958	Inf	4.19265	8.17728e-05
	0 - 5.10²	P. kluyveri	-4.92205	6.90891	Inf	-0.712421	0.756143
	0 - 5.10⁵	P. kluyveri	-6.01735	7.00848	Inf	-0.858582	0.666449
	5.10² - 5.10⁵	P. kluyveri	-1.0953	7.9635	Inf	-0.137539	0.989625
	0 - 5.10²	P. laurentii	2.41143	7.99012	Inf	0.301802	0.951032
	0 - 5.10⁵	P. laurentii	-2.33428	6.85499	Inf	-0.340522	0.938086
	5.10² - 5.10⁵	P. laurentii	-4.74571	8.79766	Inf	-0.539429	0.851863
	0 - 5.10²	R. mucilaginosa	-13.6381	6.89329	Inf	-1.97846	0.117524
	0 - 5.10⁵	R. mucilaginosa	-4.58851	6.39284	Inf	-0.717758	0.752974
	5.10² - 5.10⁵	R. mucilaginosa	9.04961	7.41291	Inf	1.22079	0.440819
	0 - 5.10²	K. sloffiae	-2.47799	6.57337	Inf	-0.376974	0.924663
	0 - 5.10⁵	K. sloffiae	2.00675	6.02116	Inf	0.333284	0.94061
	5.10² - 5.10⁵	K. sloffiae	4.48475	6.78448	Inf	0.66103	0.786087
	0 - 5.10²	H. uvarum	-21.017	9.16846	Inf	-2.29231	0.0646687
	0 - 5.10⁵	H. uvarum	-22.2965	7.68719	Inf	-2.90047	0.0135413
	5.10² - 5.10⁵	H. uvarum	-1.27949	10.4747	Inf	-0.12215	0.991808
	Stimulation were assessed through tests un sterile conical tubes. Individual gravid females (n = 25) were placed in sterile 50 mL conical tubes containing a single oviposition substrate: sterile water without yeast, sterile water inoculated with yeast at a density of 3×10² cells.mL⁻¹ or sterile water inoculated with yeast at a density of 3×10⁵ cells.mL⁻¹.
	Data from 25 independent replicates for each modality were analyzed using a Generalized Linear Mixed Model (GLMM) with a quasi-poisson distribution. Statistically significant differences between groups were identified with Tukey post hoc tests (p < 0.05).
