# Supplementary material for: Characterization of Volatile Organic Compounds from Waterborne and Nectar-Dwelling Yeasts Attractive to Asian Tiger Mosquitoes
Source: Research Square preprint supplement (doi:10.21203/rs.3.rs-7258136/v1), 2025-08-08
Supplement: Supplementary file 2 [file 6d907bfb7225c5c18a62b33a.xlsx]

## Sheet: Feuil 1
	Table S2. List of yeast emitted volatile organic compounds (VOCs) detected based on integrated HS-SPME/GC-MS peaks. All VOCs were annotated based on their mass spectra and calculated linear Kovats retention indices (RI), and are provided along with their molecular formula and identification score levels.
	Volatile organic compounds emitted by nectar dwellig yeasts
	Consensus RT	Molecular formula	Compound name	Score (%)	Database	Theorical RI	Experimental RI
	3.077	C2H6O	Ethanol	99.76	aro_CNRS	428	-
	3.906	C4H8O2	Ethyl acetate	70.44	aro_CNRS	598	-
	4.019	C4H10O	Isobutyl alcohol	86.52	Wiley275	616	-
	5.516	C5H12O	3-Methyl-1-butanol	95.61	Wiley275	730	713
	5.570	C5H12O	2-Methyl-1-butanol	95.09	Wiley275	733	716
	8.217	C7H14O2	3-Methyl-1-butanol, acetate	94.86	NIST11	881	868.057
	8.260	C7H14O2	2-Methyl-1-butanol, acetate	82.85	NIST11	883	870
	10.587	C8H16O2	Ethyl hexanoate	69.34	aro_CNRS	998	994
	12.400	NI	NI	-	-	-	1099
	Volatile organic compounds emitted by waterborne yeasts
	Consensus RT	Molecular formula	Compound name	Score (%)	Database	Theorical RI	Experimental RI
	2.946	C2H4O	Acetaldehyde	99.79	Wiley275	392	-
	3.056	C2H6O	Ethanol	99.78	aro_cnrs	428	-
	3.879	C4H8O2	Ethyl acetate	97.04	Wiley275	598	-
	4.028	C4H10O	Isobutyl alcohol	96.47	Wiley275	616	-
	5.078	C5H10O2	Ethyl propionate	92.50	aro_cnrs	708	-
	5.120	C5H10O2	Propyl acetate	85.57	aro_cnrs	702	-
	5.302	NI	NI	-	-	-	-
	5.495	C5H12O	3-Methyl-1-butanol	96.25	Wiley275	730	711
	5.529	C5H12O	2-Methyl-1-butanol	97.73	Wiley275	733	713.961
	6.174	C6H12O2	Isobutyl acetate	92.16	Wiley275	777	753.629
	8.223	C7H14O2	3-Methyl-1-butanol, acetate	98.53	NIST11	881	868.374
	8.265	C7H14O2	2-Methyl-1-butanol, acetate	96.81	NIST11	883	870.591
	10.041	C8H16O2	Pentyl propanoate	91.2	Wiley275	974	965.118
	10.581	C8H16O2	Ethyl hexanoate	69.34	aro_CNRS	998	993.964
	13.133	NI	NI	-	-	-	1145
	13.919	C10H20O2	Ethyl octanoate	84.58	Wiley275	1196	1193.62
	14.015	C12H26	Dodecane	manual interpretation		1200	1199.62
	14.864	C14H22	1,3-Di-tert-butylbenzene	76.56	Wiley275	1255	1256.92
	14.935	C10H12O2	Phenylethyl acetate	97.42	Wiley275	1265	1261.72
	15.139	NI	NI	-	-	-	1275
	16.417	C16H32	2,4,4,6,6,8,8-Heptamethyl-2-nonene	-	-	1378	1365.78
	16.791	C12H24O2	Ethyl caprate	86.03	Wiley275	1395	1392.67
	NI. Non identified
	NF. Not found
	RI. Kovats retention indices
	RT. Retention time
