# Supplementary material for: Characterization of Volatile Organic Compounds from Waterborne and Nectar-Dwelling Yeasts Attractive to Asian Tiger Mosquitoes
Source: Research Square preprint supplement (doi:10.21203/rs.3.rs-7258136/v1), 2025-08-08
Supplement: Supplementary file 3 [file 8f9b0e089ef11266df1b7399.xlsx]

## Sheet: Feuil1
	Table S1. Taxonomic identification of flowering plants collected in community gardens across the Lyon metropolitan area.
	Garden name (ID)	ID sample	Species name	Family name
	Jardins du Mas de la Forêt (FOR)	FOR-F1	Linaria genistifolia	Plantaginaceae
		FOR-F2	Mentha spicata	Lamiaceae
		FOR-F3	Eschscholtzia californica	Papaveraceae
		FOR-F4	Erigeron annuus	Asteraceae
		FOR-F5	Eschscholtzia californica	Papaveraceae
		FOR-F6	Oxalis corniculata	Oxalidaceae
		FOR-F7	Mentha spicata	Lamiaceae
		FOR-F8	Convolvulus chinensis	Convolvulaceae
		FOR-F9	Lapsana communis	Asteraceae
	Jardins EDF (EDF)	EDF-F10	Calystegia sepium	Convolvulaceae
		EDF-F11	Anagallis arvensis	Primulaceae
		EDF-F12	Veronica polita	Plantaginaceae
		EDF-F13	Oxalis corniculata	Oxalidaceae
		EDF-F14	Melissa officinalis	Lamiaceae
		EDF-F15	Rosa sp.	Rosaceae
		EDF-F16	Mirabilis jalapa	Nyctaginaceae
		EDF-F17	Erysimum cheiri	Brassicaceae
	Jardins de Sytral (SYT)	SYT-F18	Mentha spicata	Lamiaceae
		SYT-F19	Convolvulus chinensis	Convolvulaceae
		SYT-F20	Oxalis dillenii	Oxalidaceae
		SYT-F21	Erigeron annuus	Asteraceae
	Jardins de Alstom (ALS)	ALS-F22	Anagallis arvensis	Primulaceae
		ALS-F23	Veronica polita	Plantaginaceae
		ALS-F24	Erigeron annuus	Asteraceae
		ALS-F25	Eschscholtzia californica	Papaveraceae
		ALS-F26	Crepis foetida	Asteraceae
		ALS-F27	Lapsana communis	Asteraceae
		ALS-F28	Geranium robertianum	Geraniaceae
		ALS-F29	Torilis arvensis	Apiaceae
		ALS-F30	Borago officinalis	Boraginaceae
		ALS-F31	Phaseolus vulgaris	Fabaceae
		ALS-F32	Oxalis dillenii	Oxalidaceae
		ALS-F33	Mentha spicata	Lamiaceae
	Jardins de la Mouche (MOU)	MOU-F34	Mentha spicata	Lamiaceae
		MOU-F35	Convolvulus chinensis	Convolvulaceae
		MOU-F36	Crepis foetida	Asteraceae
		MOU-F37	Calystegia sepium	Convolvulaceae
		MOU-F38	Anagallis arvensis	Primulaceae
		MOU-F39	Verbena officinalis	Verbenaceae
	Jardins du Billot (BIL)	BIL-F40	Hypericum perforatum	Hypericaceae
		BIL-F41	Oxalis tetraphylla	Oxalidaceae
		BIL-F42	Verbena sp.	Verbenaceae
		BIL-F43	Epilobium hirsutum	Onagraceae
		BIL-F44	Anagallis arvensis	Primulaceae
		BIL-F45	Lavandula angustifolia	Lamiaceae
		BIL-F46	Nepeta sp.	Lamiaceae
		BIL-F47	Convolvulus chinensis	Convolvulaceae
		BIL-F48	Thymus vulgaris	Lamiaceae
		BIL-F49	Mentha spicata	Lamiaceae
	Jardins de la Garaine (GAR)	GAR-F50	Mentha spicata	Lamiaceae
		GAR-F51	Ocimum basilicum	Lamiaceae
		GAR-F52	Salvia rosmarinus	Lamiaceae
		GAR-F53	Galinsoga parviflora	Asteraceae
		GAR-F54	Origanum vulgare	Lamiaceae
		GAR-F55	Geranium robertianum	Geraniaceae
		GAR-F56	Mentha spicata	Lamiaceae
		GAR-F57	Veronica polita	Plantaginaceae
		GAR-F58	Anagallis arvensis	Primulaceae
		GAR-F59	Erigeron annuus	Asteraceae
		GAR-F60	Cichorium intybus	Asteraceae
	Jardins du Mas Rebufer (REB)	REB-F61	Eschscholtzia californica	Papaveraceae
		REB-F62	Galinsoga parviflora	Asteraceae
		REB-F63	Oxalis dillenii	Oxalidaceae
		REB-F64	Convolvulus chinensis	Convolvulaceae
		REB-F65	Erigeron annuus	Asteraceae
		REB-F66	Lavandula angustifolia	Lamiaceae
		REB-F67	Borago officinalis	Boraginaceae
		REB-F68	Mentha aquatica	Lamiaceae
		REB-F69	Mentha aquatica	Lamiaceae
	Jardins des Quatre Saisons (QUA)	QUA-F70	Viburnum tinus	Adoxaceae
		QUA-F71	Oxalis corniculata	Oxalidaceae
		QUA-F72	Galinsoga parviflora	Asteraceae
		QUA-F73	Oxalis corniculata	Oxalidaceae
		QUA-F74	Anagallis arvensis	Primulaceae
		QUA-F75	Veronica polita	Plantaginaceae
		QUA-F76	Bellis perennis	Asteraceae
		QUA-F77	Mentha spicata	Lamiaceae
		QUA-F78	Mentha spicata	Lamiaceae
		QUA-F79	Borago officinalis	Boraginaceae
		QUA-F80	Buddleja davidii	Scrophulariaceae
		QUA-F81	Trifolium repens	Fabaceae
		QUA-F82	Convolvulus chinensis	Convolvulaceae
	Jardins du Perollier (PER)	PER-F83	Origanum vulgare	Lamiaceae
		PER-F84	Borago officinalis	Boraginaceae
		PER-F85	Lactuca sp. (sativa or serriola)	Asteraceae
		PER-F86	Mentha sp.	Lamiaceae
		PER-F87	Medicago sativa	Fabaceae
		PER-F88	Aloysia citrodora	Verbenaceae
		PER-F89	Epilobium sp. (hirsutum)	Onagraceae
		PER-F90	Mentha spicata	Lamiaceae
		PER-F91	Trifolium repens	Fabaceae
		PER-F92	Medicago sativa	Fabaceae
		PER-F93	Melissa officinalis	Lamiaceae
	Jardins Reculés (REC)	REC-F94	Mentha spicata	Lamiaceae
		REC-F95	Ocimum basilicum	Lamiaceae
		REC-F96	Borago officinalis	Boraginaceae
		REC-F97	Galinsoga parviflora	Asteraceae
		REC-F98	Sonchus sp.	Asteraceae
		REC-F99	Hibiscus syriacus	Malvaceae
		REC-F100	Persicaria maculosa	Polygonaceae
		REC-F101	Calystegia sepium	Convolvulaceae
		REC-F102	Medicago lupulina	Fabaceae
		REC-F103	Veronica polita	Plantaginaceae
		REC-F104	Senecio vulgaris	Asteraceae
	Jardins SNCF Cordier (COR)	COR-F105	Mentha spicata	Lamiaceae
		COR-F106	Bellis perennis	Asteraceae
		COR-F107	Verbena sp.	Verbenaceae
		COR-F108	Oxalis dillenii	Oxalidaceae
		COR-F109	Trifolium repens	Fabaceae
		COR-F110	Hibiscus syriacus	Malvaceae
		COR-F111	Hibiscus syriacus	Malvaceae
		COR-F112	Borago officinalis	Boraginaceae
		COR-F113	Clinopodium menthifolium	Lamiaceae
	Jardins de la Tase (TAS)	TAS-F114	Galinsoga parviflora	Asteraceae
		TAS-F115	Mentha spicata	Lamiaceae
		TAS-F116	Erigeron annuus	Asteraceae
		TAS-F117	Symphyotrichum novi-belgii	Asteraceae
		TAS-F118	Mentha arvensis	Lamiaceae
		TAS-F119	Mentha spicata	Lamiaceae
	Jardins de Francheville (FRA)	FRA-F120	Diplotaxis tenuifolia	Brassicaceae
		FRA-F121	Mentha sp.	Lamiaceae
		FRA-F122	Linum usitatissimum	Linaceae
		FRA-F123	Galinsoga parviflora	Asteraceae
		FRA-F124	Oxalis dillenii	Oxalidaceae
		FRA-F125	Salvia rosmarinus	Lamiaceae
		FRA-F126	Veronica polita	Plantaginaceae
		FRA-F127	Mentha sp.	Lamiaceae
		FRA-F128	Borago officinalis	Boraginaceae
		FRA-F129	Persicaria maculosa	Polygonaceae
		FRA-F130	Phacelia tanacetifolia	Hydrophyllaceae
