# Supplementary material for: Characterization of Volatile Organic Compounds from Waterborne and Nectar-Dwelling Yeasts Attractive to Asian Tiger Mosquitoes
Source: Research Square preprint supplement (doi:10.21203/rs.3.rs-7258136/v1), 2025-08-08
Supplement: Supplementary file 4 [file c6165221d25384b4ddad08b5.xlsx]

## Sheet: Yeast cell concentrations
	Mean cell concentrations of the most prevalent-abundant yeasts species detected in breeding-site waters (colonized or not by Aedes albopictus larvae) and in flowers (visited or not by Ae. albopictus adults) through a culture-based approach.
		Breeding-sites				Flowering plants
	Yeast species	NC watersa	C watersa		Yeast species	NV flowersb	V flowersb
	Cystobasidium slooffiae	1.11×101 ± 3.33×101	2.00×102 ± 5.64×102		Aureobasidium pullulans	1.44×101 ± 6.52×101	4.50×101 ± 1.11×102
	Hanseniaspora uvarum	2.22×101 ± 4.41×101	1.11×101 ± 2.21×101		Filobasidium magnum	3.00×103 ± 2.25×104	1.93×102 ± 5.91×102
	Papiliotrema laurentii	4.44×101 ± 7.68×101	2.22×101 ± 6.67×101		Metschnikowia reukaufii	1.12×103 ± 4.91×103	4.41×103 ± 1.22×104
	Pichia kluyveri	5.56×100 ± 1.67×101	0.00×100 ± 0.00×100		Rhodotorula glutinis	6.82×102 ± 3.94×103	2.68×103 ± 1.12×104
	Rhodotorula mucilaginosa	2.78×101 ± 4.41×101	1.17×102 ± 2.91×101
	Torulaspora delbrueckii	5.00×101 ± 8.66×101	3.33×101 ± 7.07×101
	a Mean cell concentration (UFC.mL-1) ± standard error in non-colonized (NC) or colonized (C) breeding-site waters by Ae. albopictus larvae
	b Mean cell concentration (UFC.mL-1) ± standard error in non-visited (NV) or visited (V) flowers by Ae. albopictus adults

## Sheet: Oviposition bioassays
	Impact of yeast species and their cell concentration on Aedes albopictus female oviposition behavior.
			Oviposition preference bioassaya						Oviposition stimulation bioassayb
	Yeast species		Total number of eggs laid by each female		Number of eggs laid by each female according to yeast concentration (cells.mL-1)				Number of eggs laid by each female according to concentration (cells.mL-1)
					0	3.102	3.105		0	3.102	3.105
	C. slooffiae		34.79 ± 21.66		6.68 ± 9.74	10.95 ± 15.49	17.16 ± 15.48		42.84 ± 20.99	45.32 ± 20.78	40.83 ± 18.01
	H. uvarum		39.53 ± 35.75		10.37 ± 9.88	13.16 ± 20.82	16 ± 18.23		42.84 ± 20.99	63.86 ± 29.32	65.14 ± 27.75
	P. laurentii		14.42 ± 21.25		1.95 ± 6.93	5.32 ± 10.05	7.16 ± 15.23		42.84 ± 20.99	40.43 ± 29.48	45.17 ± 30.86
	P. kluyveri		13.53 ± 21.61		1.37 ± 3.76	7.42 ± 13.49	4.74 ± 8.49		42.84 ± 20.99	47.76 ± 24.01	48.86 ± 19.58
	R. mucilaginosa		42.11 ± 15.51		10.53 ± 15.9	12.47 ± 16.3	19.11 ± 18.65		42.84 ± 20.99	56.48 ± 15.97	47.43 ± 21.77
	T. delbrueckii		10.43 ± 14.08		1.76 ± 4.05	1.71 ± 3.35	6.95 ± 12.33		42.84 ± 20.99	52.22 ± 27.07	22.2 ± 28.72
	a Oviposition preference bioassay carried out in cages (n = 24), where individual gravid female may choose to lay eggs in three different artificial breeding-sites (i.e. yeast-free breeding-site, breeding-site containing a yeast concentration of 3.102 cells.mL-1 or of 3.105 cells.mL-1). Mean number of total eggs (± error standard) laid by females per cage and mean number of eggs (± error standard…
	b To test oviposition stimulation, individual gravid females (n = 25) were placed into 50 mL conical sterile tubes containing an unique oviposition substrate (yeast-free sterile water, sterile water inoculated with a yeast concentration of 3.102 cells.mL-1 or of 3.105 cells.mL-1). Mean number of eggs laid (± error standard) by each female according to each type of oviposition substrate.
